# Supplementary material for: Modeling of the hydrophobic microenvironment of water-soluble molybdoenzymes in an aqueous micellar solution
Source: Royal Society of Chemistry journal article supplement (doi:10.1039/c5dt01112d), 2015-01-01
Supplement: c5dt01112d1.pdf [file c5dt01112d1.pdf]

**Supplementary Information:**

**Modeling of the hydrophobic microenvironment of water-soluble  
molybdoenzymes in an aqueous micellar solution**

*Yuki Hasenaka, Taka-aki Okamura\*, and Kiyotaka Onitsuka*

Department of Macromolecular Science, Graduate School of Science, Osaka University, Toyonaka,  
Osaka 560-0043, Japan

E-mail: tokamura@chem.sci.osaka-u.ac.jp

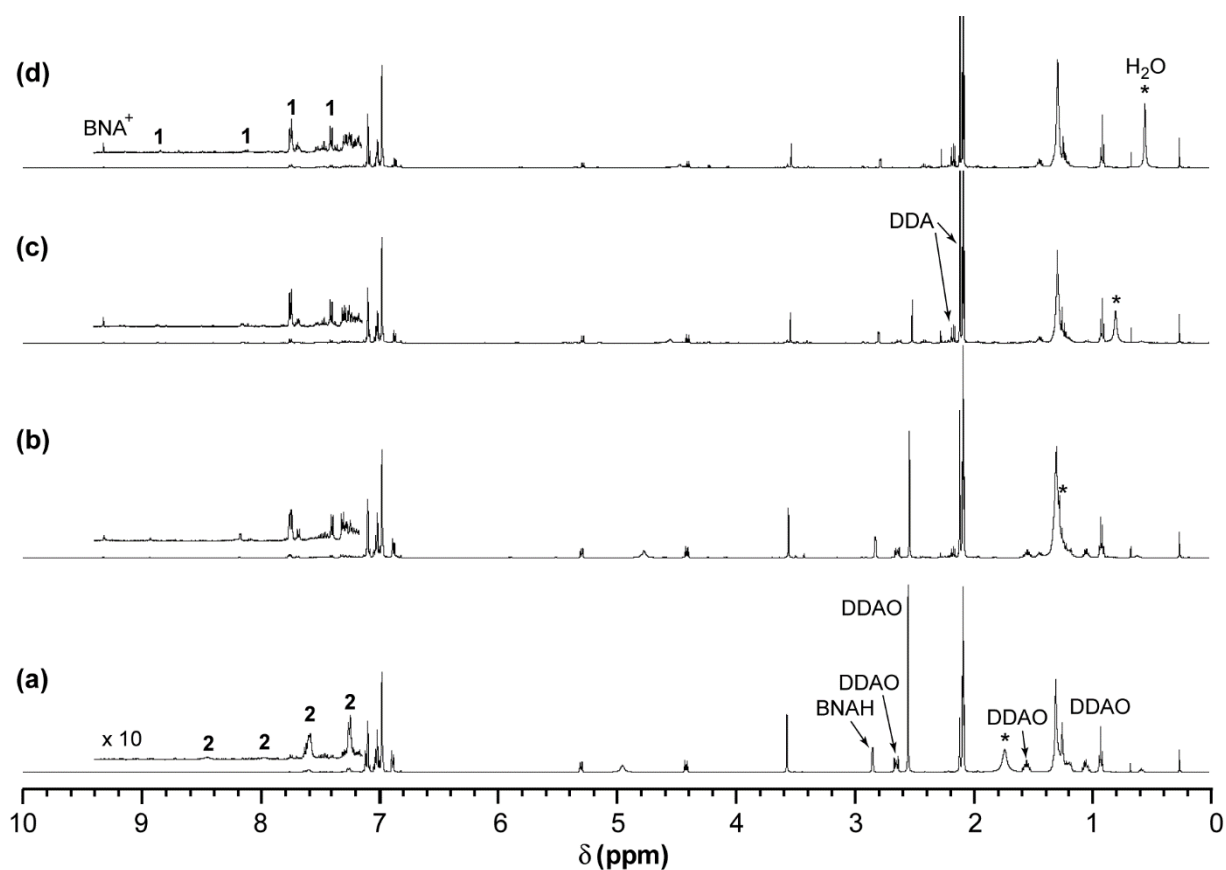

**Fig. S1**  $^1\text{H}$  NMR spectral change in water-containing toluene- $d_8$  during the catalytic reduction of DDAO by BNAH with 2 mol% of **2** at 27 °C after (a) 0.5 h, (b) 96 h, (c) 373 h, and (d) 887 h.

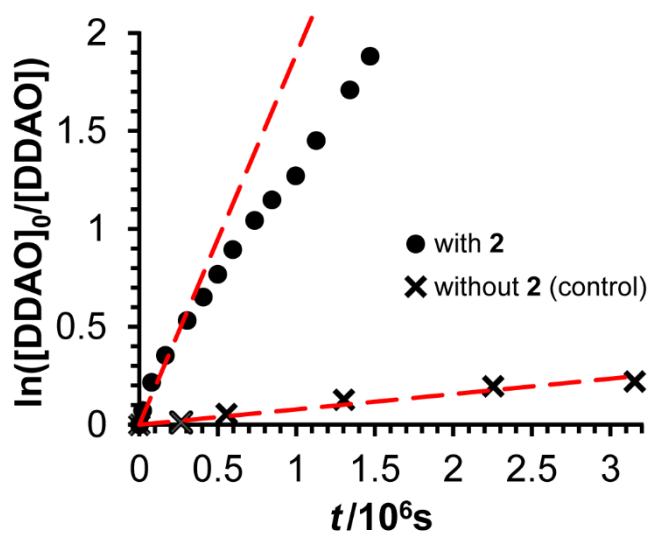

**Fig. S2** Kinetic plots of the catalytic reduction of DDAO by BNAH with **2** and the control experiment in water-containing toluene- $d_8$ .
